# Supplementary material for: Live-cell imaging of circadian clock protein dynamics in CRISPR-generated knock-in cells
Source: bioRxiv or medRxiv preprint supplement (doi:10.1101/2020.02.28.967752), 2020-02-28
Supplement: Supplementary file [file media-1.pdf]

**SUPPLEMENTARY TABLES AND FIGURES**

**Supplementary Table S1: DNA sequences**

| <b>Part</b>                      | <b>Sequence</b>                                                                                                                                                                                                                                                                                                                                                                                                                                                                                                                                                                                                                                                                                                                                                                                                                                                                                                                                                                                                                                                                                                                                                                                                                                                                                                                                                                                           |
|----------------------------------|-----------------------------------------------------------------------------------------------------------------------------------------------------------------------------------------------------------------------------------------------------------------------------------------------------------------------------------------------------------------------------------------------------------------------------------------------------------------------------------------------------------------------------------------------------------------------------------------------------------------------------------------------------------------------------------------------------------------------------------------------------------------------------------------------------------------------------------------------------------------------------------------------------------------------------------------------------------------------------------------------------------------------------------------------------------------------------------------------------------------------------------------------------------------------------------------------------------------------------------------------------------------------------------------------------------------------------------------------------------------------------------------------------------|
| <b>His-Flag-Tag (HF-tag)</b>     | CACCATCACCATCACCATGGTAGCGGTGACTACAAAGACGATGACGACAAG                                                                                                                                                                                                                                                                                                                                                                                                                                                                                                                                                                                                                                                                                                                                                                                                                                                                                                                                                                                                                                                                                                                                                                                                                                                                                                                                                       |
| <b>hCD4 extracellular domain</b> | ATGAACCGGGGAGTCCCTTTTAGGCACCTTGCTTCTGGTGCTGCAACTGGCGCTCCTCCCA<br>GCAGCCACTCAGGGAAAGAAAGTGGTGCTGGGCAAAAAGGGGATACAGTGGAAGTACC<br>TGTACAGCTTCCCAGAAGAAGAGCATAACAATTCCACTGGAAAACTCCAACCAGATAAAG<br>ATTCTGGGAAATCAGGGCTCCTTCTTAACTAAAGGTCCATCCAAGCTGAATGATCGCGCT<br>GACTCAAGAAGAAGCCTTTGGGACCAAGGAAACTTCCCCCTGATCATCAAGAATCTTAAG<br>ATAGAAGACTCAGATACTTACATCTGTGAAGTGGAGGACCAGAAGGAGGAGGTGCAATTG<br>CTAGTGTTTCGGATTGACTGCCAACTCTGACACCCACCTGCTTCAGGGGCAGAGCCTGACC<br>CTGACCTTGGAGAGCCCCCTGGTAGTAGCCCCCTCAGTGCAATGTAGGAGTCCAAGGGGT<br>AAAAACATACAGGGGGGAAGACCCTCTCCGTGTCTCAGCTGGAGCTCCAGGATAGTGGC<br>ACCTGGACATGCACTGTCTTGCAGAACCAGAAGAAGGTGGAGTTCAAAATAGACATCGTG<br>GTGCTAGCTTTCCAGAAGGCCTCCAGCATAAGTCTATAAGAAAGAGGGGGAACAGGTGGAG<br>TTCTCCTTCCCACTCGCCTTTACAGTTGAAAAGCTGACGGGCAGTGGCGAGCTGTGGTGG<br>CAGGCGGAGAGGGCTTCTCCTCCAAGTCTTGGATCACCTTTGACCTGAAGAACAAGGAA<br>GTGTCTGTAAAACGGGTTACCCAGGACCCTAAGCTCCAGATGGGCAAGAAGCTCCCCGCTC<br>CACCTCACCTGCCCCAGGCCTTGCTCAGTATGCTGGCTCTGGAAACCTCACCTGGCC<br>CTTGAAGCGAAAACAGGAAAGTTGCATCAGGAAGTGAACCTGGTGGTGATGAGAGCCACT<br>CAGCTCCAGAAAAATTTGACCTGTGAGGTGTGGGGACCCACCTCCCCTAAGCTGATGCTG<br>AGCTTGAAGTGGAGAACAAGGAGGCAAAGGTCTCGAAGCGGGGAGAAGGCGGTGTGGGTG<br>CTGAACCCTGAGGCGGGGATGTGGCAGTGTCTGCTGAGTACTCGGGACAGGTCTGCTG<br>GAATCCAACATCAAGTTCTGCCCACATGGTCGACCCCGGTGCAGCCAATGGCCCTGATT<br>GTGCTGGGGGGCGTCGCCGGCCTCCTGCTTTTCATTGGGCTAGGCATCTTCTTCTGTGTC<br>AGGTGCCGGCACTGA |
| <b>mClover3</b>                  | GTGAGCAAGGGCGAGGAGCTGTTTACCAGGGGTGGTGCCCATCCTGGTTCGAGCTGGACGGC<br>GACGTAAACGGCCACAAGTTTCAGCGTCCGCGGCGAGGGCGAGGGCGATGCCACCAACGGC<br>AAGCTGACCCTGAAGTTTCATCTGCACCACCGGCAAGCTGCCCGTGCCTTGGCCACCCCTC<br>GTGACCACCTTCGGCTACGGCGTGGCCTGCTTTCAGCCGCTACCCCGACCACATGAAGCAG<br>CACGACTTCTTCAAGTCCGCCATGCCCGAAGGCTACGTCCAGGAGCGCACCATCTCTTTC<br>AAGGACGACGGTACCTACAAGACCCGCGCCGAGGTGAAGTTCGAGGGCGACACCCTGGTG<br>AACCGCATCGAGCTGAAGGGCATCGACTTCAAGGAGGACGGCAACATCCTGGGGACAAG<br>CTGGAGTACAACCTTCAACAGCCACTACGTCTATATCACGGCCGACAAGCAGAAGAAGTGC<br>ATCAAGGCTAACTTCAAGATCCGCCACAACGTTGAGGACGGCAGCGTGCAGCTCGCCGAC<br>CACTACCAGCAGAACACCCCATCGGCGACGGCCCCGTGCTGCTGCCCCGACAACCCTAC<br>CTGAGCCATCAGTCCAAGCTGAGCAAAGACCCCAACGAGAAGCGCGATCACATGGTCTCTG<br>CTGGAGTTCGTGACCGCCGCGGGATTACACATGGCATGGACGAGCTGTACAAG                                                                                                                                                                                                                                                                                                                                                                                                                                                                                                                                                                                                                |
| <b>mScarlet-I</b>                | GTGAGCAAGGGCGAGGAGTTCATGCGGTTCAAGGTGCACATGGAGGGC<br>TCCATGAACGGCCACGAGTTTCGAGATCGAGGGCGAGGGCGAGGGCCGCCCTACGAGGGC<br>ACCCAGACCGCCAAGCTGAAGGTGACCAAGGGTGGCCCCCTGCCCTTCTCCTGGGACATC<br>CTGTCCCCTCAGTTTCATGTACGGCTCCAGGGCCTTTCATCAAGCACCCCGCCGACATCCCC<br>GACTACTATAAGCAGTCTTCCCCGAGGGCTTCAAGTGGGAGCGCGTGAAGTTCGAG<br>GACGGCGGGCGCCGTGACCGTGACCCAGGACACCTCCCTGGAGGACGGCACCCCTGATCTAC<br>AAGGTGAAGCTCCGCGGCACCAACTTCCCTCCTGACGGCCCCGTAATGCAGAAGAAGACA<br>ATGGGCTGGGAAGCGTCCACCGAGCGGTTGTACCCCGAGGACGGCGTGTGAAGGGCGAC<br>ATTAAGATGGCCCTGCGCCTGAAGGACGGCGGCGCTACCTGGCGGACTTCAAGACCACC<br>TACAAGGCCAAGAAGCCCGTGCAGATGCCCGGCGCCTACAACGTCGACCGCAAGTTGGAC<br>ATCACCTCCCACAACGAGGACTACACCGTGGTGAACAGTACGAACGCTCCGAGGGCCGC<br>CACTCCACCGGCGGCATGGACGAGCTGTACAAG                                                                                                                                                                                                                                                                                                                                                                                                                                                                                                                                                                                                                                                        |

**CFP-P2A-BlaR**

ATGGTGAGCAAGGGCGAGGAGCTGTTACCGGGGTGGTGCCCATCCTGGTCGAGCTGGAC  
GGCGACGTAAACGGCCACAAGTTTCAGCGTGTCCGGCGAGGGCGAGGGCGATGCCACCTAC  
GGCAAGCTGACCCTGAAGTTTCATCTGCACCACCGGCAAGCTGCCCGTGCCCTGGCCCACC  
CTCGTGACCACCCTGACCTGGGGCGTGCAGTGCTTCGCCCCGTACCCCCGACCACATGAAG  
CAGCAGGACTTCTTCAAGTCCGCCATGCCCCGAAGGCTACGTCCAGGAGCGCACCATCTTC  
TTCAAGGACGACGGCAACTACAAGACCCGCGCCGAGGTGAAGTTTCGAGGGCGACACCCTG  
GTGAACCGCATCGAGCTGAAGGGCATCGACTTCAAGGAGGACGGCAACATCCTGGGGCAC  
AAGCTGGAGTACAACGCCATCAGCGACAACGTCTATATCACCGCCGACAAGCAGAAGAAC  
GGCATCAAGGCCAACTTCAAGATCCGCCACAACATCGAGGACGGCAGCGTGCAGCTCGCC  
GACCACTACCAGCAGAACACCCCCATCGGCGACGGCCCCGTGCTGCTGCCCGACAACCAC  
TACCTGAGCACCCAGTCCAAGCTGAGCAAAGACCCCCAACGAGAAGCGCGATCACATGGTC  
CTGCTGGAGTTCGTGACCGCCGCGGGATCACTCTCGGCATGGACGAGCTGTACAAGGAA  
TTCGGAAGCGGAGCTACTAACTTCAGCCTGCTGAAGCAGGCTGGAGACGTGGAGGAGAAC  
CCTGGACCTCACGTGGCCAAGCCTTTGTCTCAAGAAGAATCCACCCTCATTGAAAGAGCA  
ACGGCTACAATCAACAGCATCCCCATCTCTGAAGACTACAGCGTCGCCAGCGCAGCTCTC  
TCTAGCGACGGCCGCATCTTCACTGGTGTCAATGTATATCATTTTACTGGGGACCTTGT  
GCAGAACTCGTGGTGTGGGCACTGCTGCTGCTGCGGCAGCTGGCAACCTGACTTGTATC  
GTCGCGATCGGAAATGAGAACAGGGGCATCTTGAGCCCCCTGCGGACGGTGCCGACAGGTG  
CTTCTCGATCTGCATCCTGGGATCAAAGCCATAGTGAAGGACAGTGATGGACAGCCGACG  
GCAGTTGGGATTTCGTGAATTGCTGCCCTCTGGTTATGTGTGGGAGGGCTAA

**LoxP Site**

ATAACTTCGTATAGCATAACATTATACGAAGTTAT

**FrtF Site**

GAAGTTCCTATTCCGAAGTTCCTATTCTCTAGAAAGTATAGGAACTTC

**Frt3 Site**

GAAGTTCCTATTCCGAAGTTCCTATTCTTCAAATAGTATAGGAACTTC

**dClover2**

GTGAGCAAGGGCGAGGAGCTGTTACCGGGGTGGTGCCCATCCTGGTCGAGCTGGACGGC  
GACGTAAACGGCCACAAGTTTCAGCGTCCGCGGGCGAGGGCGAGGGCGATGCCACCATCGGC  
AAGCTGACCCTGAAGTTTCATCTGCACCACCGGCAAGCTGCCCGTGCCCTGGCCCACCCTC  
GTGACCACCTTCGGCTACGGCGTGGCCTGCTTCAGCCGCTACCCCGACCACATGAAGCAG  
CACGACTTCTTCAAGTCCGCCATGCCCGAAGGCTACGTCCAGGAGCGCACCATCTACTTC  
AAGGACGACGGTACCTACAAGACCCGCGCCGAGGTGAAGTTTCGAGGGCGACACCCTGGTG  
AACCGCATCGAGCTGAAGGGCATCGACTTCAAGGAGGACGGCAACATCCTGGGGCACAAAG  
CTGGAGTACAACCTTCAACAGCCACTACGTCTATATCACGGCCGACAAGCAGAACAACAGC  
ATCAAGGCTAACTTACCATCCGCCACAACGTTGAGGACGGCAGCGTGCAGCTCGCCGAC  
CACTACCAGCAGAACACCCCCATCGGCGACGGCCCCGTGCTGCTGCCCGACAACCACTAC  
CTGAGCCATCAGTCCGCCCTGAGCAAAGACCCCAACGAGAAGCGCGATCACATGGTCTCTG  
CTGGAGTTCGTGACCGCCGCGGGATTACACATGGCATGGACGAGCTGTACAAG

---

**Supplementary Table S2: Sequences of single guide RNAs**

| <b>Target</b>      | <b>Guide sequence</b> | <b>Target sequence fw strand (PAM underlined)</b> |
|--------------------|-----------------------|---------------------------------------------------|
| CRY1 (fw strand)   | GGAAACGTCCTAGTCAGGAAG | GGAAACGTCCTAGTCAGGAAG <u>AGG</u>                  |
| PER2-1 (rv strand) | CACCACCTGGTGTACCTCGC  | <u>CC</u> AGCGAGGTACACCAGGTGGTG                   |
| PER2-2 (fw strand) | ATGGATCCCCCTTGAATCAC  | ATGGATCCCCCTTGAATCAC <u>AGG</u>                   |
| PER3-3 (fw strand) | GGCAGCCAGCGAGGTACACC  | GGCAGCCAGCGAGGTACACC <u>AGG</u>                   |

**Supplementary Table S3: shRNA constructs**

| <b>Target</b>                | <b>Hairpin sequence (targeting sequence underlined)</b>                                                                                  |
|------------------------------|------------------------------------------------------------------------------------------------------------------------------------------|
| PER2 (pGIPZ<br>V2LHS_52938)  | TGCTG TTGAC AGTGA GCGCG <u>CATCC ATATT TCACT</u> GAAAA<br>TAGTG AAGCC ACAGA TGTAT <u>TTACA GTGAA ATATG</u> GATGC<br>ATGCC TACTG CCTCG GA |
| CRY1 (pGIPZ<br>V2LHS_172866) | TGCTG TTGAC AGTGA GCGCG <u>CTGAG GCAAG CCGTT</u> TGAAT<br>TAGTG AAGCC ACAGA TGTA <u>TTCAA ACGGC TTGCC</u> TCAGC<br>ATGCC TACTG CCTCG GA  |

**Supplementary Table S4: Sequences of PCR primers**

| <b>Target</b>           | <b>Sequence</b>              | <b>Usage</b>                | <b>Figure</b>                   |
|-------------------------|------------------------------|-----------------------------|---------------------------------|
| CRY1 genomic locus (fw) | ACTGCCACTGATTGCCTGGGATTGAAGT | fw primer<br>genomic PCR    | Fig. S1D,<br>Fig. S5C           |
| CRY1 genomic locus (rv) | CAGCTGCAACAGTATTCTCCTG       | Rv primer<br>Genomic<br>PCR | Fig. S1D,<br>Fig. S5C           |
| PER2 genomic locus (fw) | ACCGGCTTCCAGGAGCCTCACTTGCA   | fw primer<br>genomic PCR    | Fig. S1D,<br>Fig. S5C           |
| PER2 genomic locus (rv) | AAGCTGTCAGACTGAGTGGC         | Rv primer<br>genomic PCR    | Fig. S1D,<br>Fig. S5C           |
| HF tag (rv)             | TTGCTAGCCTTGTCGTCATC         | RT primer                   | Fig. 1C<br>Fig. S1C<br>Fig. S5B |
| HF tag (rv)             | ATCGTCTTTGTAGTCACCGCTACC     | Rv primer<br>RT-PCR         | Fig. 1C<br>Fig. S1C             |
| CRY1 mRNA               | TGCTGAGGCAAGCCGTTTGA         | Fw primer<br>RT-PCR         | Fig. 1C<br>Fig. S1C             |
| PER2 mRNA               | ACGCCCTTTCCACGTCAAGC         | Fw primer<br>RT-PCR         | Fig. 1C<br>Fig. S1C             |
| mScarlet-I              | GTCTTGAAGTCCGCCAGGTAGC       | Rv primer<br>RT-PCR         | Fig. S5B                        |
| mClover3                | ACGCTGAACTTGTGGCCGTTT        | Rv primer<br>RT-PCR         | Fig. S5B                        |

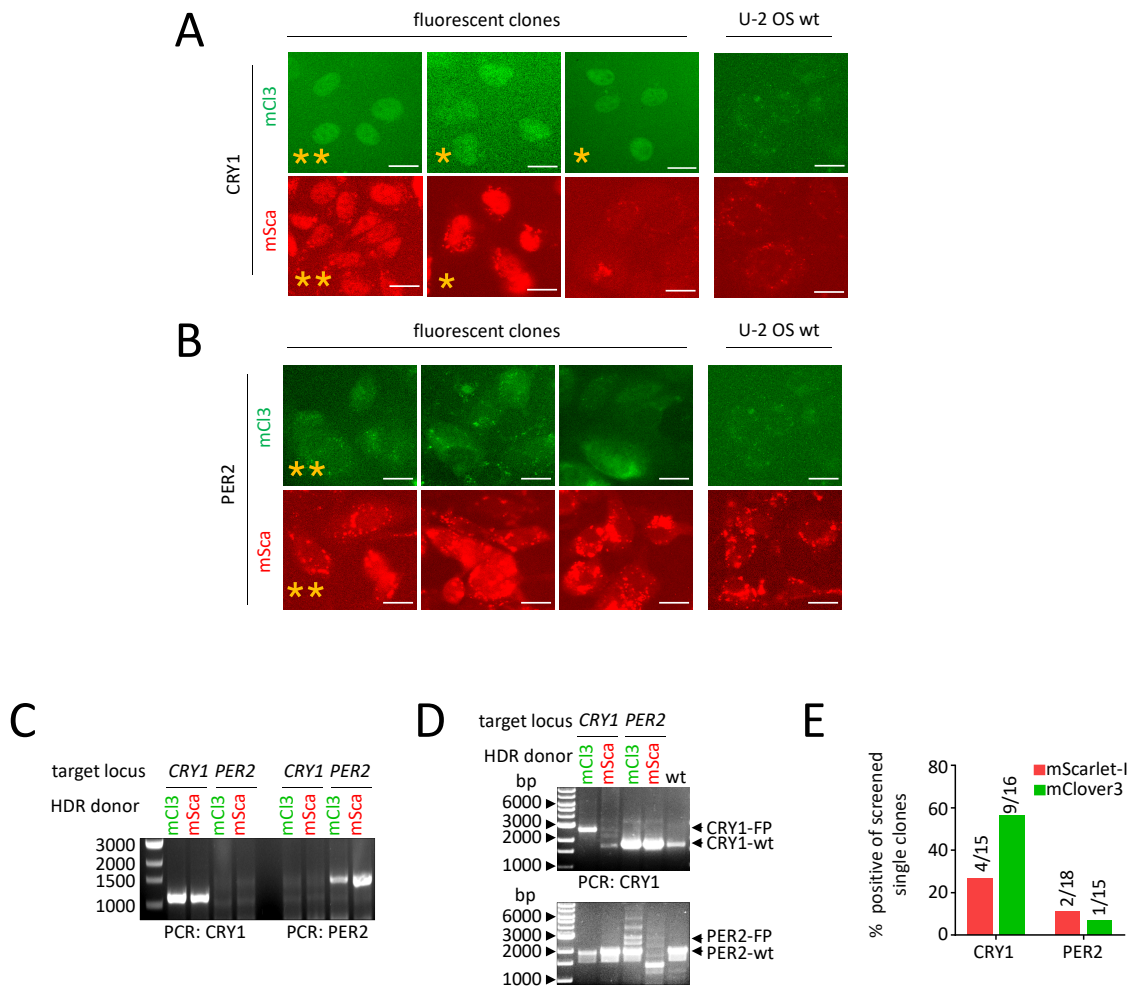

**Supplementary Figure S1: Screening of potential single knock-in clones. (A) and (B):** Screening of potential CRY1 (A) and PER2 (B) knock-in clones by fluorescence microscopy using YFP and RFP channel. For each knock-in, 3 examples of fluorescent cells are shown along with wild-type cells that show autofluorescence only. Clones that were confirmed positive for correct knock-in by PCR afterwards are marked with \*, clones used for all further analysis with \*\*. **(C)** Chimeric mRNA was detected in single clones by RT-PCR (as in Fig. 1C). **(D)** Successful knock-in was confirmed by amplification of the targeted region of PER2 and CRY1 genomic loci by PCR, which shows either wild-type allele, the larger knock-in allele or both. Additional bands are probably heteroduplexes of wild-type and knock-in product. **(E)** Percentage of positive knock-in clones in relation to all screened clones for the 4 different knock-in experiments. Numbers indicate count of correct and initially screened clonal colonies, respectively.

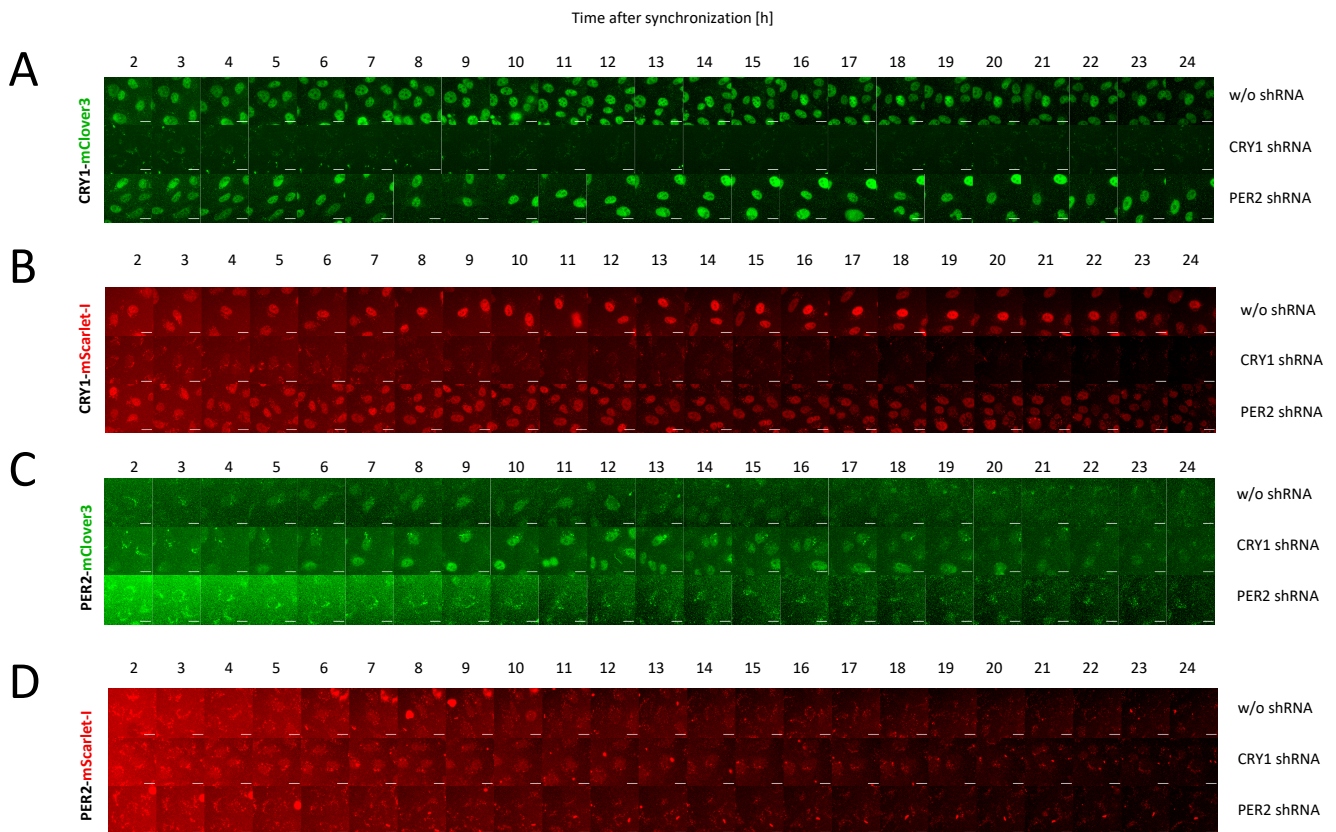

**Supplementary Figure S2: Complete time series of knock-down experiment (Fig. 1F).** U-2 OS knock-in cells expressing CRY1-mClover3 (**A**), CRY1-mScarlet-I (**B**), PER2-mClover3 (**C**) or PER2-mScarlet-I (**D**), respectively, were either left untreated or transduced with shRNA targeting either CRY1 or PER2. After synchronization, fluorescence in the respective channel was recorded for 24 hours. Scale bar: 20  $\mu$ m.

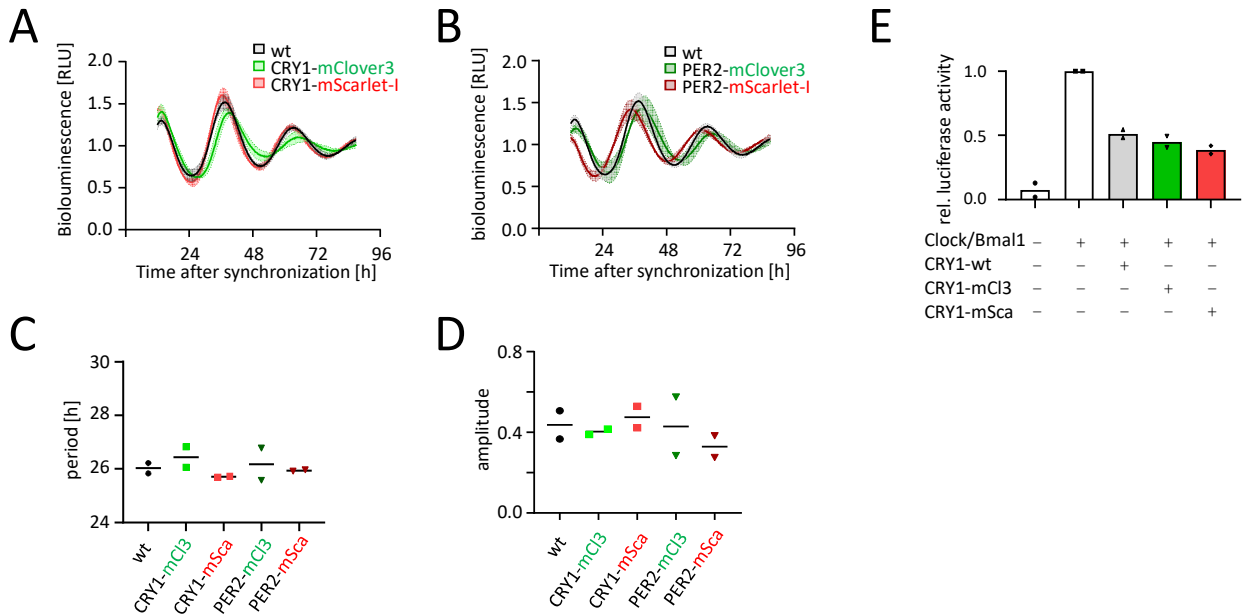

**Supplementary Figure S3: Analysis of circadian rhythms in single knock-in cells. (A)-(D)** Individual clones and wild-type cells were transduced with a *Bmal1*:Luc reporter and luminescence was recorded over four days. Depicted are mean + SD of four individual, detrended traces resulting from two independent experiments **(A)** and **(B)**, and mean calculated period lengths **(C)** and amplitude **(D)** for both experiments. **(E)** Ability of CRY fusion proteins to inhibit CLOCK/BMAL1 induced activation of an E-BOX reporter plasmid. HEK-293 cells were transfected with an 6xEBOX-Luciferase reporter plus the indicated constructs and reporter activity was measured (n=2).



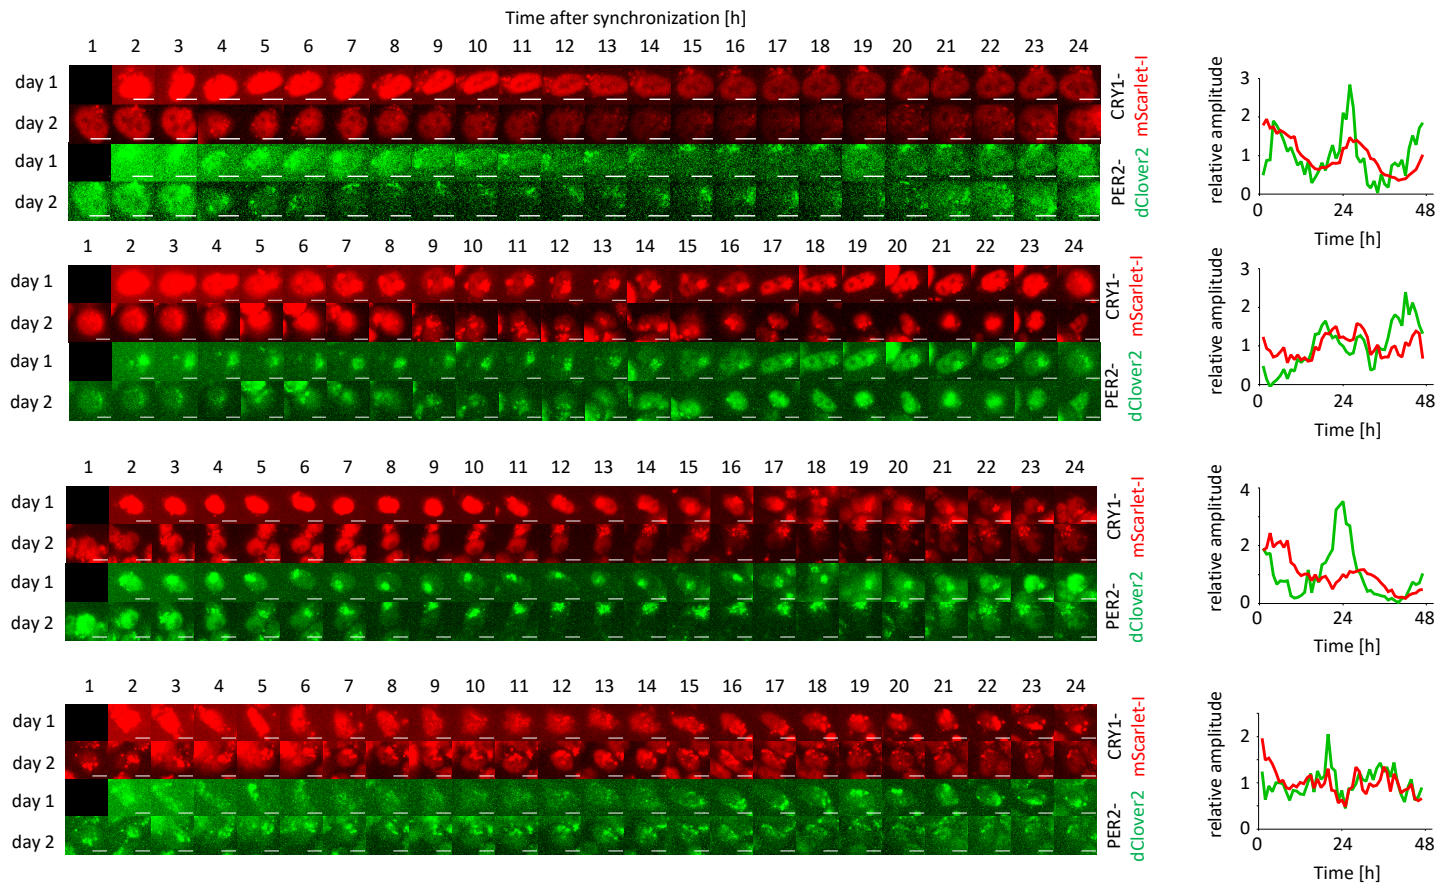

**Supplementary Figure S4: Time series of HCT-116 double knock-in cells.** Montages of bicolor fluorescence microscopy images of individual HCT-116 double-knock-in (PER2-dClover2/CRY1-mScarlet-I) cell's nuclei over the course of 2 days. Traces of 4 individual cells are shown. Mean nuclear fluorescence signals were quantified, backgrounds subtracted and signals normalized by dividing by mean signal of the time course. Scale bar: 10  $\mu$ M.

Supplementary Figure S4

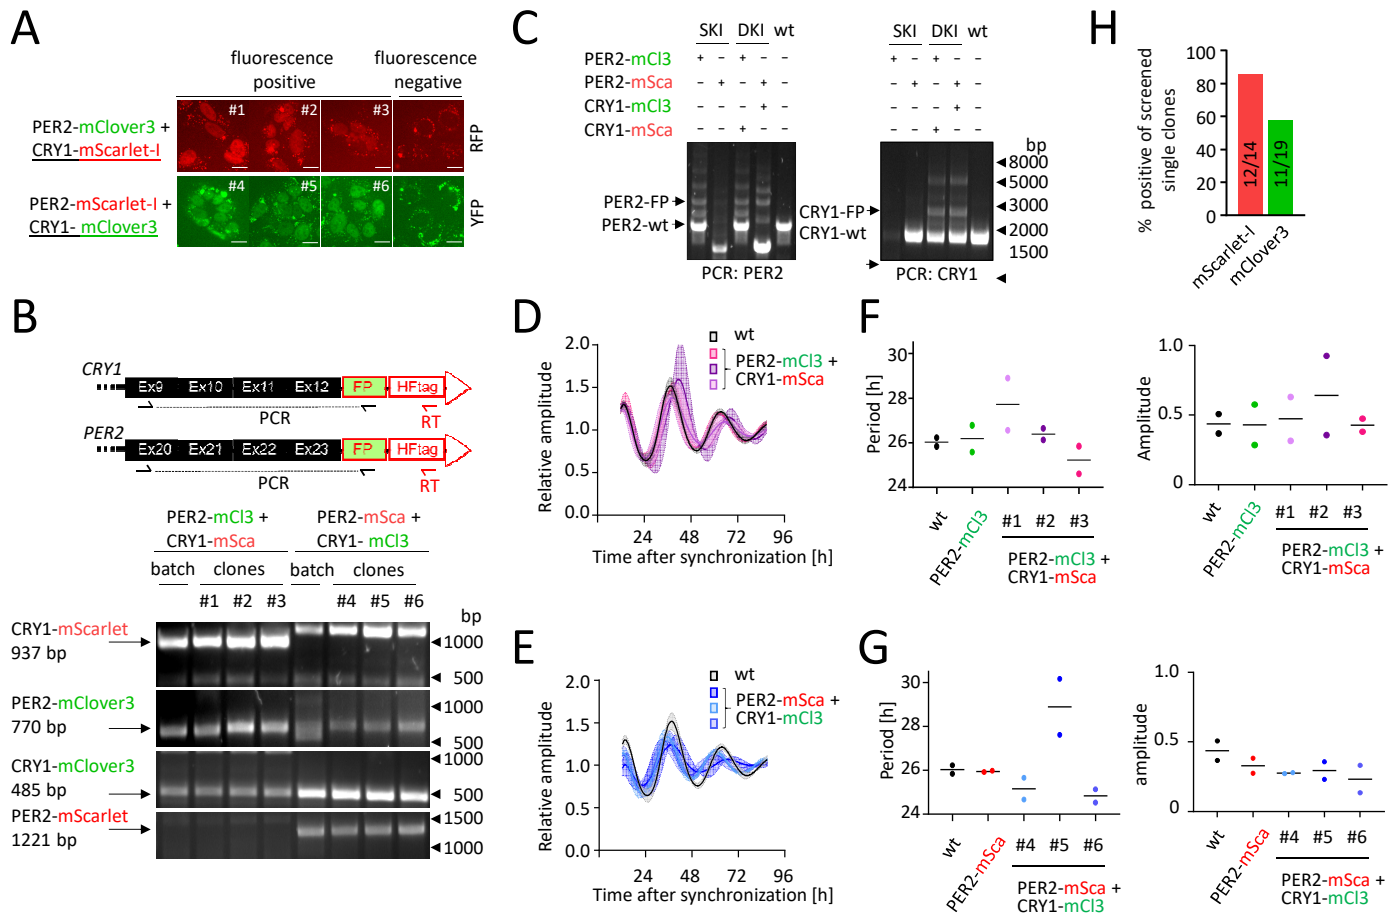

**Supplementary Figure S5: Selection and characterization of double knock in clones.** (A) Screening of clones with potential CRY1-knock in by fluorescence microscopy. For each knock-in, 3 example clones with the expected pattern are shown along with a negative clone. (B) Chimeric mRNA was detected in the three single clones from A by RT-PCR using RT-primer specific to the insertion, gene specific forward and fluorophore specific reverse primer. Arrows indicate the expected band for righteous insertion. (C) Successful knock-in was confirmed by amplification of the edited genomic locus using out-out PCR followed by Sanger sequencing. Results exemplarily shown for DKI clones #3 and #6. (D-G) Individual double knock-in clones, the corresponding parental clone and wt cells were transduced with a *Bmal1:Luc* reporter and luminescence was recorded over four days. Depicted are mean + SD of four individual, detrended traces resulting from two independent experiments (D-E), and mean calculated period lengths and amplitude for both experiments (F-G). Clone #6 was used for imaging analysis. (H) Percentage of positive knock-in clones in relation to all screened clones. Scale bar: 20  $\mu$ m. mCl3 = mClover3, mSca = mScarlet-I, FP = fluorescent protein (mScarlet-I or mClover3).
